# Supplementary material for: Differential Expression of mRNAs in Peripheral Blood Related to Prodrome and Progression of Alzheimer's Disease
Source: PubMed Central journal article supplement (PMC7648929; doi:10.1155/2020/4505720), 2020-10-31

A

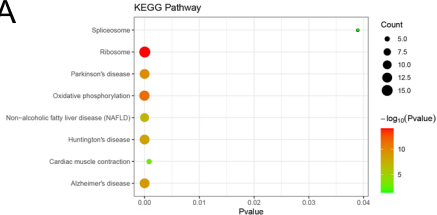

B

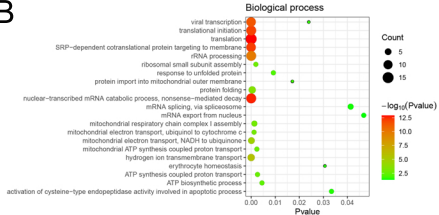

C

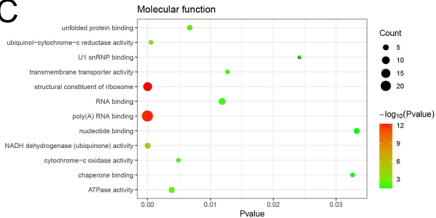

D

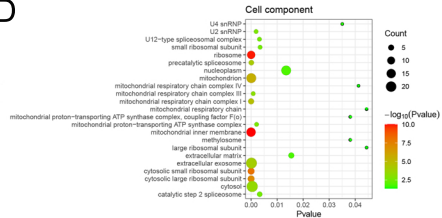

Supplement: 4505720.f5.pdf [file 4505720.f5.pdf]
